# Supplementary material
Source: publisher figshare collection journal article supplement (https://gsapubs.figshare.com/ndownloader/files/23304110)
Supplement: Supplementary file 1 [file 23304110]

## Sheet: calc
Sample #	classification	description	details	SiO2	Al2O3	Fe2O3(T)	MnO	MgO	CaO	Na2O	K2O	TiO2	P2O5	BaO	CoO	ZnO	%Si	%Al	%Fe	%Mn	%Mg	%Ca	%Na	%K	%Ti	%P	%Ba	LOI	Total	Li	Sc	Be	V	Cr	Co	Ni	Cu	Zn	Ga	Ge	As	Rb	Sr	Y	Zr	Nb	Mo	Ag	In
DR150124-A2	jasperoid breccia matrix - Mtn City Window	silicified shady dolomite CLAST	Mt City breccia; clast of mostly chert	94.78	1.03	2.12	0.201	0.09	0.06	0.03	0.3	0.041	0.06	0.0371926	0.00406876	0.0136923	44.304	0.545127	1.48279	0.155666	0.054279	0.042882	0.0222558	0.249318	0.0245799	0.0261852	0.0333	1.33	100.079	70	2	2	18	0.25	32	30	10	110	29	0.7	8	7	24	12.9	21	1	0	0	0
DR150124-A1	jasperoid breccia matrix - Mtn City Window	silicified shady dolomite matrix	Mt City breccia; fracture fill-dendrites	24.9	4.81	2.66	49.71	0.1	0.11	0.13	2.64	0.24	0.56	2.81346	0.446292	0.141902	11.6393	2.54569	1.86048	38.4984	0.06031	0.078617	0.0964418	2.194	0.143882	0.244395	2.519	9.81	98.4835	150	9	19	77	20	1000	440	200	1140	50	0.9	10	31	312	146	206	2.8	0	0	0
JC-7c	jasperoid breccia matrix - Mtn City Window	shrub	Mtn City breccia; cryptomelane-hollandite	2.71	2.3	4.71	70.49	0.03	0.16	0.18	2	0.022	0.92				1.26676	1.21727	3.29432	54.5917	0.018093	0.114352	0.133535	1.66212	0.0131892	0.401506	5.184	11.55	95.08		4	23	97	0.25	1000	230	340	1300	43	1.2	26	16	353	101	6	0	6	0	0
JC-10	jasperoid breccia matrix - Mtn City Window	frothy layered stromatolite	from Tina Delahunty's garage pit	2.7	1.35	81.83	0.232	0.05	0	0.02	0.1	0.037	2.47				1.26209	0.714488	57.2344	0.179675	0.030155	0	0.0148372	0.083106	0.0221819	1.07796	0.0082	12.17	101		2	9	20	0.25	146	260	70	1830	7	0.8	43	3	7	10.7	10	0.3	0	0	0
SH-2	jasperoid breccia matrix - Mtn City Window	silicified shady dolomite matrix	float piece from Steve Hageman	22.1	1.64	26.94	32.61	0.02	0.06	0.05	0.21	0.02	0.35				10.3304	0.86797	18.8426	25.2551	0.012062	0.042882	0.037093	0.174523	0.0119902	0.152747	4.793	10.77	94.78		2	7	28	30	970	80	280	620	27	0	35	4	35	104	5	0	6	0	0
AM-01	nodule - Mtn City Window	nodule	Merschat nodule sample	28.03	9.47	3.38	36.54	0.32	0.11	0.12	5.88	0.365	0.15	6.15185	1.00829	0.15435	13.1023	5.012	2.36407	28.2988	0.192992	0.078617	0.0890232	4.88663	0.218821	0.065463	5.508	8.75	99.2669	530	16	13	90	40	1000	670	370	1240	45	1	11	62	78	104	89	5.8	7	0	0
DR150124-B	nodule - Mtn City Window	nodule	Mt City platy Mn-oxide nodule	28.5	9	2.79	36.56	0.33	0.05	0.14	6.7	0.376	0.16	6.56064	0.143678	0.10456	13.322	4.76325	1.95141	28.3143	0.199023	0.035735	0.10386	5.5681	0.225416	0.0698272	5.874	7.81	98.9766	130	13	8	87	40	1000	250	160	840	39	0.8	8	72	39	49.8	85	4.4	0	0	0
JC-7b	nodule - Mtn City Window	nodule	Mtn City breccia; romanechite, microcline	29.36	8.1	5.9	35.97	0.41	0.09	0.12	5.44	0.335	0.2				13.724	4.28693	4.12664	27.8573	0.247271	0.064323	0.0890232	4.52097	0.200836	0.087284	5.009	7.41	93.34		14	12	85	40	1000	190	370	950	43	1.4	13	57	74	63.8	50	3.8	4	0	0
K130712-A	nodule - Shenandoah Valley	nodule	Stanley nodule; Mick's sample A	5.24	2.81	0.59	69.6	0.11	0.33	0.23	2.16	0.064	0.38	2.5186	0.137321	0.797889	2.44939	1.48719	0.412664	53.9024	0.066341	0.235851	0.170628	1.79509	0.0383686	0.16584	2.255	13.43	97.4626	20	17	327	41	440	1000	270	170	6410	50	1.5	8	29	2175	55.2	66	1.4	0	0	0
K130712-B	nodule - Shenandoah Valley	nodule	Stanley nodule; Mick's sample B	12.89	4.66	2.11	62.32	0.19	0.12	0.09	1.7	0.223	0.38	1.68428	0.122699	0.433175	6.0253	2.46631	1.4758	48.2643	0.114589	0.085764	0.0667674	1.4128	0.133691	0.16584	1.508	12.14	98.5073	60	13	212	55	120	965	150	190	3480	51	1.6	8	25	985	82.5	63	3.3	0	0.5	0
K130712-B2	nodule - Shenandoah Valley	nodule	Stanley nodule; Mick's sample B-rep	19.86	5.88	2.23	54.69	0.18	0.11	0.07	1.34	0.303	0.34	1.80155	0.0993032	0.326126	9.28336	3.11199	1.55973	42.3552	0.108558	0.078617	0.0519302	1.11362	0.181652	0.148383	1.613	11.67	98.4746	40	14	158	48	140	781	160	200	2620	50	1.1	11	23	787	74.8	99	4.6	0	0.7	0
DR150417-A	quartzite breccia matrix - Shenandoah Valley	quartzite breccia matrix	Lyndhurst breccia; MnO ore float sample	1.35	2.38	0.3	75.69	0.02	0.2	0.28	1.74	0.013	0.51	4.88976	1.15578	0.12821	0.631044	1.25961	0.209829	58.6189	0.012062	0.14294	0.207721	1.44604	0.00779363	0.222574	4.378	11.95	99.3228	190	5	13	33	30	1000	350	550	1030	49	1.3	12	11	390	276	104	0.2	12	0	0
DRBYC-646	quartzite breccia matrix - Shenandoah Valley	quartzite breccia matrix	Larry's place breccia; xstlln cryptomelane	6.05	1.67	0.19	68.22	0	0.16	0.28	1.08	0.005	0.11	8.87149	0.198352	0.0448112	2.82801	0.883848	0.132892	52.8337	0	0.114352	0.207721	0.897545	0.00299755	0.0480062	7.943	11.62	98.2565	0	2	4	0	70	1000	40	570	360	35	1.6	0	10	35	66.3	193	3.7	0	0	0
K130618-A	quartzite breccia matrix - Shenandoah Valley	quartzite breccia matrix	Larry's place breccia; Mick's sample, dated	3.02	2.79	5.09	63.74	0	0.15	0.2	0.95	0.006	0.35	9.71028	0.260655	0.0385875	1.41167	1.47661	3.5601	49.3641	0	0.107205	0.148372	0.789507	0.00359706	0.152747	8.694	12.35	98.3563	20	10	9	26	30	1000	40	670	310	39	2.2	9	7	19	93	80	9.3	2	0	0
K130618-B	quartzite breccia matrix - Shenandoah Valley	quartzite breccia matrix	Larry's place breccia; Mick's sample, dated	1.48	1.14	0.39	73.91	0	0.19	0.16	0.59	0.008	0.29	10.3826	0.199624	0.0423217	0.691811	0.603345	0.272778	57.2403	0	0.135793	0.118698	0.490325	0.00479608	0.126562	9.296	10.51	99.0506	0	2	8	13	0.25	1000	0	80	340	44	1.2	0	3	19	17.1	111	0.6	0	0	0
K130618-C	quartzite breccia matrix - Shenandoah Valley	quartzite breccia matrix	Linden quad breccia; corner quarry, Mick's sample-dated	2.2	0.73	0.47	70.55	0	0.07	0.06	0.35	0.003	0.35	14.5978	0.336944	0.0360979	1.02837	0.386352	0.328732	54.6382	0	0.050029	0.0445116	0.290871	0.00179853	0.152747	13.07	9.93	99.3108	0	2	5	15	0.25	1000	40	60	290	43	0.8	11	3	17	5.8	38	0.7	3	0	0
K130712-C1	quartzite breccia matrix - Shenandoah Valley	quartzite breccia matrix	Compton mine breccia; Mick's sample, dated	1.34	0.79	0.13	71.76	0	0.08	0.07	0.37	0.009	0.28	14.5085	0.397976	0.0360979	0.62637	0.418108	0.0909259	55.5752	0	0.057176	0.0519302	0.307492	0.00539559	0.122198	12.99	10.02	99.3575	10	3	6	16	0.25	1000	40	90	290	47	0.9	8	3	11	20	39	0	4	0	0
			conversion factors for Wt % oxides	0.46744	0.52925	0.69943	0.77446	0.6031	0.7147	0.74186	0.83106	0.59951	0.43642
[truncated: 28 more columns]

## Sheet: processed
Sample #	%Si	%Al	%Fe	%Mn	%Mg	%Ca	%Na	%K	%Ti	%P	Li	Sc	Be	V	Cr	Co	Ni	Cu	Zn	Ga	Ge	As	Rb	Sr	Y	Zr	Nb	Mo	Ag	In	Sn	Sb	Cs	Ba	La	Ce	Pr	Nd	Sm	Eu	Gd	Tb	Dy	Ho	Er	Tm	Yb	Lu	Hf
DR150124-A2	0.44304	0.00545128	0.0148279	0.00155666	0.00054279	0.00042882	0.000222558	0.00249318	0.000245799	0.000261852	0.007	0.0002	0.0002	0.0018	2.5e-05	0.0032	0.003	0.001	0.011	0.0029	7e-05	0.0008	0.0007	0.0024	0.00129	0.0021	0.0001	0	0	0	0	0	2e-05	0.0333	0.000624	0.00151	0.000119	0.000469	8.1e-05	1.96e-05	7.7e-05	1.8e-05	0.000123	3.2e-05	9.5e-05	1.52e-05	9.9e-05	1.55e-05	3e-05
DR150124-A1	0.116393	0.0254569	0.0186048	0.384984	0.0006031	0.00078617	0.000964418	0.02194	0.00143882	0.00244395	0.015	0.0009	0.0019	0.0077	0.002	0.1	0.044	0.02	0.114	0.005	9e-05	0.001	0.0031	0.0312	0.0146	0.0206	0.00028	0	0	0	0	2e-05	0.00011	2.519	0.00118	0.00475	0.000305	0.00156	0.000546	0.000167	0.000793	0.000166	0.0014	0.000366	0.00129	0.000211	0.00136	0.000235	0.00051
JC-7c	0.0126676	0.0121727	0.0329432	0.545917	0.00018093	0.00114352	0.00133535	0.0166212	0.000131892	0.00401506	0	0.0004	0.0023	0.0097	2.5e-05	0.1	0.023	0.034	0.13	0.0043	0.00012	0.0026	0.0016	0.0353	0.0101	0.0006	0	0.0006	0	0	0	5e-05	0	5.184	0.000295	0.000806	7.4e-05	0.000346	0.000119	5.09e-05	0.00024	5.5e-05	0.000543	0.000185	0.000694	0.000119	0.000796	0.000121	4e-05
JC-10	0.0126209	0.00714488	0.572344	0.00179675	0.00030155	0	0.000148372	0.00083106	0.000221819	0.0107796	0	0.0002	0.0009	0.002	2.5e-05	0.0146	0.026	0.007	0.183	0.0007	8e-05	0.0043	0.0003	0.0007	0.00107	0.001	3e-05	0	0	0	0.0003	0	2e-05	0.0082	0.000691	0.00149	0.000169	0.000605	0.000127	2.61e-05	0.000138	2.7e-05	0.00018	3.5e-05	0.000103	1.73e-05	0.00012	1.76e-05	3e-05
SH-2	0.103304	0.0086797	0.188426	0.252551	0.00012062	0.00042882	0.00037093	0.00174523	0.000119902	0.00152747	0	0.0002	0.0007	0.0028	0.003	0.097	0.008	0.028	0.062	0.0027	0	0.0035	0.0004	0.0035	0.0104	0.0005	0	0.0006	0	0	0.0005	9e-05	0	4.793	0.000434	0.00222	0.000241	0.00137	0.000507	0.000142	0.000773	0.000164	0.00127	0.000305	0.000969	0.000153	0.00102	0.000159	4e-05
AM-01	0.131023	0.05012	0.0236407	0.282988	0.00192992	0.00078617	0.000890232	0.0488663	0.00218821	0.00065463	0.053	0.0016	0.0013	0.009	0.004	0.1	0.067	0.037	0.124	0.0045	0.0001	0.0011	0.0062	0.0078	0.0104	0.0089	0.00058	0.0007	0	0	0.0006	0	0.00026	5.508	0.00278	0.0291	0.00101	0.00482	0.00167	0.000455	0.00191	0.000396	0.00268	0.000555	0.0016	0.00024	0.00147	0.000221	0.00018
DR150124-B	0.13322	0.0476325	0.0195141	0.283143	0.00199023	0.00035735	0.0010386	0.055681	0.00225416	0.000698272	0.013	0.0013	0.0008	0.0087	0.004	0.1	0.025	0.016	0.084	0.0039	8e-05	0.0008	0.0072	0.0039	0.00498	0.0085	0.00044	0	0	0	0	2e-05	0.00024	5.874	0.0024	0.00831	0.00057	0.00238	0.000748	0.000215	0.00082	0.000178	0.00126	0.000258	0.000737	0.000107	0.000683	0.000104	0.00024
JC-7b	0.13724	0.0428692	0.0412664	0.278573	0.00247271	0.00064323	0.000890232	0.0452097	0.00200836	0.00087284	0	0.0014	0.0012	0.0085	0.004	0.1	0.019	0.037	0.095	0.0043	0.00014	0.0013	0.0057	0.0074	0.00638	0.005	0.00038	0.0004	0	0	0.0002	7e-05	0.0003	5.009	0.0026	0.00809	0.000605	0.00238	0.000599	0.000171	0.000803	0.000176	0.00131	0.000286	0.000841	0.000126	0.000812	0.000115	0.00022
K130712-A	0.0244939	0.0148719	0.00412664	0.539024	0.00066341	0.00235851	0.00170628	0.0179509	0.000383686	0.0016584	0.002	0.0017	0.0327	0.0041	0.044	0.1	0.027	0.017	0.641	0.005	0.00015	0.0008	0.0029	0.2175	0.00552	0.0066	0.00014	0	0	0	0	0.00015	6e-05	2.255	0.00285	0.0353	0.0013	0.00635	0.00281	0.000697	0.00275	0.000406	0.00219	0.000334	0.000846	0.000115	0.000773	0.000118	0.00018
K130712-B	0.060253	0.0246631	0.014758	0.482643	0.00114589	0.00085764	0.000667674	0.014128	0.00133691	0.0016584	0.006	0.0013	0.0212	0.0055	0.012	0.0965	0.015	0.019	0.348	0.0051	0.00016	0.0008	0.0025	0.0985	0.00825	0.0063	0.00033	0	5e-05	0	0.0001	7e-05	0.00017	1.508	0.00267	0.0215	0.00103	0.0056	0.00319	0.000819	0.00361	0.000605	0.0032	0.00049	0.00124	0.000176	0.00111	0.000165	0.00023
K130712-B2	0.0928336	0.0311199	0.0155973	0.423552	0.00108558	0.00078617	0.000519302	0.0111362	0.00181652	0.00148383	0.004	0.0014	0.0158	0.0048	0.014	0.0781	0.016	0.02	0.262	0.005	0.00011	0.0011	0.0023	0.0787	0.00748	0.0099	0.00046	0	7e-05	0	0	6e-05	0.00017	1.613	0.00275	0.0186	0.00105	0.00661	0.00392	0.00103	0.004	0.000659	0.00345	0.000515	0.00131	0.000184	0.00121	0.000178	0.0004
DR150417-A	0.00631044	0.0125961	0.00209829	0.586189	0.00012062	0.0014294	0.00207721	0.0144604	7.79363e-05	0.00222574	0.019	0.0005	0.0013	0.0033	0.003	0.1	0.035	0.055	0.103	0.0049	0.00013	0.0012	0.0011	0.039	0.0276	0.0104	2e-05	0.0012	0	0	0	0	0	4.378	0.00117	0.0055	0.00113	0.00804	0.00413	0.00135	0.00674	0.00102	0.00581	0.00113	0.00318	0.000474	0.00314	0.000522	0.00033
DRBYC-646	0.0282801	0.00883848	0.00132892	0.528337	0	0.00114352	0.00207721	0.00897545	2.99755e-05	0.000480062	0	0.0002	0.0004	0	0.007	0.1	0.004	0.057	0.036	0.0035	0.00016	0	0.001	0.0035	0.00663	0.0193	0.00037	0	0	0	0.0004	0	0	7.943	0.00269	0.00595	0.000837	0.0041	0.0018	0.000639	0.00213	0.000328	0.00194	0.000368	0.00101	0.000139	0.000844	0.00013	0.00046
K130618-A	0.0141167	0.0147661	0.035601	0.493641	0	0.00107205	0.00148372	0.00789507	3.59706e-05	0.00152747	0.002	0.001	0.0009	0.0026	0.003	0.1	0.004	0.067	0.031	0.0039	0.00022	0.0009	0.0007	0.0019	0.0093	0.008	0.00093	0.0002	0	0	0	3e-05	0	8.694	0.00168	0.00778	0.00069	0.00369	0.00206	0.000748	0.00266	0.000441	0.0027	0.000531	0.00149	0.000233	0.00148	0.000228	0.00038
K130618-B	0.00691811	0.00603345	0.00272778	0.572403	0	0.00135793	0.00118698	0.00490325	4.79608e-05	0.00126562	0	0.0002	0.0008	0.0013	2.5e-05	0.1	0	0.008	0.034	0.0044	0.00012	0	0.0003	0.0019	0.00171	0.0111	6e-05	0	0	0	0.0003	2e-05	0	9.296	0.00116	0.00215	0.000246	0.000978	0.000436	0.000232	0.000564	7.6e-05	0.0004	7.3e-05	0.000193	2.76e-05	0.000191	3.01e-05	0.0003
K130618-C	0.0102837	0.00386353	0.00328732	0.546382	0	0.00050029	0.000445116	0.00290871	1.79853e-05	0.00152747	0	0.0002	0.0005	0.0015	2.5e-05	0.1	0.004	0.006	0.029	0.0043	8e-05	0.0011	0.0003	0.0017	0.00058	0.0038	7e-05	0.0003	0	0	0	0.00015	0	13.07	0.000688	0.00141	0.000139	0.000711	0.000479	0.000238	0.000392	3.9e-05	0.000172	3e-05	7.9e-05	1.12e-05	7.7e-05	1.41e-05	0.00011
K130712-C1	0.0062637	0.00418108	0.000909259	0.555752	0	0.00057176	0.000519302	0.00307492	5.39559e-05	0.00122198	0.001	0.0003	0.0006	0.0016	2.5e-05	0.1	0.004	0.009	0.029	0.0047	9e-05	0.0008	0.0003	0.0011	0.002	0.0039	0	0.0004	0	0	0	0	0	12.99	0.00204	0.00322	0.000499	0.00222	0.00103	0.000367	0.00101	0.000111	0.000512	8.9e-05	0.000229	3.01e-05	0.000202	3.21e-05	0.0001
[truncated: 7 more columns]

## Sheet: arcsin transformed
Sample #	%Si	%Al	%Fe	%Mn	%Mg	%Ca	%Na	%K	%Ti	%P	Li	Sc	Be	V	Cr	Co	Ni	Cu	Zn	Ga	Ge	As	Rb	Sr	Y	Zr	Nb	Mo	Ag	In	Sn	Sb	Cs	Ba	La	Ce	Pr	Nd	Sm	Eu	Gd	Tb	Dy	Ho	Er	Tm	Yb	Lu	Hf
DR150124-A2	3.81651	0.423036	0.69771	0.22606	0.133488	0.118648	0.0854764	0.28609	0.0898286	0.0927155	0.479378	0.0810288	0.0810288	0.243087	0.028648	0.324117	0.313825	0.181186	0.600937	0.30855	0.0479373	0.162058	0.151591	0.280693	0.205788	0.262564	0.057296	0	0	0	0	0	0.0256236	1.04561	0.143126	0.222645	0.0625026	0.124083	0.0515664	0.025366	0.050277	0.0243086	0.0635444	0.0324115	0.0558452	0.0223381	0.0570088	0.0225575	0.0313823
DR150124-A1	1.95511	0.914209	0.781539	3.55733	0.140708	0.160651	0.177933	0.848708	0.217335	0.283252	0.701747	0.171888	0.249748	0.502777	0.256236	1.81216	1.20194	0.810315	1.9349	0.405147	0.0543558	0.181186	0.319012	1.0121	0.692327	0.822381	0.0958746	0	0	0	0	0.0256236	0.0600926	9.13227	0.196819	0.394889	0.100063	0.226302	0.133882	0.0740428	0.161347	0.0738208	0.214383	0.109614	0.205788	0.0832273	0.211298	0.0878331	0.129393
JC-7c	0.644883	0.632161	1.03999	4.23724	0.077069	0.193752	0.209374	0.738699	0.0658012	0.363056	0	0.114592	0.274783	0.564309	0.028648	1.81216	0.86897	1.05655	2.06628	0.375718	0.0627646	0.292155	0.229185	1.07656	0.575827	0.140346	0	0.140346	0	0	0	0.0405144	0	13.1608	0.0984092	0.162664	0.0492879	0.106577	0.0625026	0.0408774	0.0887626	0.0424919	0.133513	0.077931	0.15094	0.0625026	0.161652	0.0630256	0.0362372
JC-10	0.643692	0.484314	4.33878	0.242867	0.0994957	0	0.0697912	0.165174	0.0853343	0.594885	0	0.0810288	0.171888	0.256236	0.028648	0.692327	0.92391	0.479378	2.45179	0.151591	0.0512471	0.375718	0.0992396	0.151591	0.18742	0.181186	0.0313823	0	0	0	0.0992396	0	0.0256236	0.518844	0.150613	0.221166	0.0744848	0.14093	0.0645693	0.0292715	0.0673076	0.0297719	0.0768707	0.0338968	0.0581491	0.0238313	0.0627646	0.024037	0.0313823
SH-2	1.84187	0.533805	2.48789	2.88059	0.0629266	0.118648	0.11035	0.23936	0.062739	0.22393	0	0.0810288	0.151591	0.303183	0.313825	1.78476	0.512478	0.95879	1.42681	0.29772	0	0.33897	0.114592	0.33897	0.584317	0.128118	0	0.140346	0	0	0.128118	0.0543558	0	12.6462	0.119363	0.269962	0.0889473	0.212073	0.129012	0.0682761	0.1593	0.0733747	0.204187	0.100063	0.178356	0.0708713	0.182989	0.0722475	0.0362372
AM-01	2.07441	1.28282	0.880992	3.04939	0.251707	0.160651	0.170953	1.26667	0.268022	0.146596	1.31917	0.229185	0.206584	0.543566	0.362374	1.81216	1.48324	1.10218	2.01802	0.384356	0.057296	0.19003	0.451154	0.506031	0.584317	0.540537	0.137987	0.151591	0	0	0.140346	0	0.0923871	13.5735	0.302099	0.977444	0.18209	0.397788	0.234144	0.122217	0.250405	0.114018	0.296615	0.134981	0.229185	0.0887626	0.219677	0.0851767	0.0768707
DR150124-B	2.09173	1.25058	0.80041	3.05023	0.25561	0.108311	0.18465	1.35213	0.272031	0.151404	0.653289	0.206584	0.162058	0.534429	0.362374	1.81216	0.905967	0.724763	1.66083	0.357816	0.0512471	0.162058	0.486179	0.357816	0.404336	0.528251	0.120185	0	0	0	0	0.0256236	0.0887626	14.0261	0.280693	0.522313	0.136792	0.279521	0.156702	0.0840125	0.164071	0.0764424	0.203381	0.092031	0.155546	0.0592675	0.149739	0.0584307	0.0887626
JC-7b	2.12307	1.18639	1.164	3.02549	0.284913	0.145314	0.170953	1.21835	0.256771	0.169275	0	0.214383	0.19848	0.528251	0.362374	1.81216	0.789796	1.10218	1.76626	0.375718	0.0677936	0.206584	0.432579	0.492885	0.457656	0.405147	0.111691	0.114592	0	0	0.0810288	0.0479373	0.0992396	12.9328	0.292155	0.515353	0.14093	0.279521	0.140229	0.0749243	0.162361	0.0760118	0.207377	0.0968964	0.166159	0.0643146	0.163269	0.0614431	0.0849837
K130712-A	0.896748	0.698745	0.368066	4.21036	0.147576	0.278256	0.236674	0.76768	0.112231	0.233329	0.256236	0.236238	1.03615	0.366876	1.20194	1.81216	0.941512	0.74707	4.59217	0.405147	0.070173	0.162058	0.30855	2.67308	0.425694	0.46548	0.0677936	0	0	0	0	0.070173	0.0443813	8.63661	0.305878	1.07656	0.206584	0.456579	0.303724	0.151266	0.300464	0.115448	0.268132	0.104712	0.166652	0.0614431	0.1593	0.0622394	0.0768707
K130712-B	1.40656	0.899841	0.696063	3.98371	0.193953	0.167794	0.14805	0.681044	0.209496	0.233329	0.443817	0.206584	0.834272	0.424922	0.627659	1.78016	0.701747	0.789796	3.38194	0.409179	0.0724744	0.162058	0.286481	1.79851	0.520424	0.454778	0.104083	0	0.0405144	0	0.057296	0.0479373	0.0747049	7.05379	0.296061	0.840154	0.183884	0.428768	0.32361	0.163971	0.344255	0.14093	0.324117	0.12683	0.20176	0.0760118	0.190892	0.0735981	0.0868937
K130712-B2	1.746	1.0108	0.715583	3.73151	0.18878	0.160651	0.130567	0.604646	0.2442	0.220708	0.362374	0.214383	0.720219	0.396962	0.677951	1.60142	0.724763	0.810315	2.93403	0.405147	0.0600926	0.19003	0.274783	1.60757	0.495542	0.570097	0.122886	0	0.0479373	0	0	0.0443813	0.0747049	7.29652	0.300464	0.781437	0.185661	0.465833	0.358732	0.183884	0.362374	0.147085	0.33654	0.130025	0.207377	0.0777201	0.199305	0.0764424	0.114592
DR150417-A	0.455154	0.643061	0.262457	4.39105	0.0629266	0.216622	0.261135	0.68901	0.0505818	0.270311	0.789796	0.128118	0.206584	0.329142	0.313825	1.81216	1.07197	1.34383	1.83915	0.401075	0.0653275	0.19848	0.19003	1.13158	0.951916	0.584317	0.0256236	0.19848	0	0	0	0	0	12.0777	0.195983	0.424922	0.192604	0.513757	0.368216	0.210519	0.470391	0.182989	0.436734	0.192604	0.323102	0.124742	0.321064	0.130906	0.104083
DRBYC-646	0.963575	0.538666	0.208869	4.16834	0	0.193752	0.261135	0.542824	0.0313695	0.125537	0	0.0810288	0.114592	0	0.479378	1.81216	0.362374	1.36805	1.08718	0.33897	0.0724744	0	0.181186	0.33897	0.466537	0.796007	0.110211	0	0	0	0.114592	0	0	16.3697	0.297168	0.441964	0.165763	0.366876	0.243087	0.144836	0.264433	0.103768	0.252364	0.109913	0.18209	0.067551	0.166455	0.0653275	0.122886
K130618-A	0.680771	0.696254	1.08114	4.02891	0	0.1876	0.2207	0.509106	0.0343636	0.22393	0.256236	0.181186	0.171888	0.292155	0.313825	1.81216	0.362374	1.48324	1.00885	0.357816	0.0849837	0.171888	0.151591	0.249748	0.552551	0.512478	0.17473	0.0810288	0	0	0	0.0313823	0	17.149	0.234844	0.505382	0.150504	0.348049	0.260052	0.156702	0.295507	0.120322	0.29772	0.13203	0.221166	0.0874586	0.220423	0.0865151	0.111691
K130618-B	0.476566	0.445053	0.299248	4.33901	0	0.211137	0.1974	0.401208	0.0396796	0.203834	0	0.0810288	0.162058	0.206584	0.028648	1.81216	0	0.512478	1.05655	0.380061	0.0627646	0	0.0992396	0.249748	0.236932	0.603662	0.0443813	0	0	0	0.0992396	0.0256236	0	17.7518	0.195144	0.265672	0.0898653	0.179182	0.119638	0.0872707	0.136071	0.0499495	0.114592	0.0489537	0.0795982	0.0301009	0.0791847	0.0314346	0.0992396
K130618-C	0.58104	0.356139	0.328509	4.23905	0	0.128155	0.120882	0.309013	0.0242987	0.22393	0	0.0810288	0.128118	0.221907	0.028648	1.81216	0.362374	0.443817	0.975763	0.375718	0.0512471	0.19003	0.0992396	0.236238	0.137987	0.353199	0.0479373	0.0992396	0	0	0	0.070173	0	21.1939	0.150286	0.215147	0.067551	0.152778	0.125399	0.088392	0.11344	0.0357813	0.075143	0.0313823	0.0509258	0.0191749	0.050277	0.0215146	0.0600926
K130712-C1	0.453465	0.370486	0.17277	4.27531	0	0.137003	0.130567	0.317719	0.0420866	0.200289	0.181186	0.0992396	0.140346	0.229185	0.028648	1.81216	0.362374	0.543566	0.975763	0.392805	0.0543558	0.162058	0.0992396	0.19003	0.256236	0.357816	0	0.114592	0	0	0	0	0	21.1259	0.258786	0.325128	0.12799	0.269962	0.183884	0.109763	0.18209	0.0603651	0.129646	0.0540529	0.0867046	0.0314346	0.0814329	0.0324621	0.057296
[truncated: 7 more columns]
